# Supplementary material for: A cross-cultural exploration of magical thinking in obsessive-compulsive disorder: Psychometric insights from India and Australia using the Illusory Beliefs Inventory
Source: Research Square preprint supplement (doi:10.21203/rs.3.rs-7132394/v1), 2025-07-29
Supplement: Supplementary file 1 [file 446437444e6bef7922770362.docx]

| **Table 4. Rotated factor loadings for the extracted items of The Illusory Beliefs Inventory (IBI)-15 items in the Indian Sample** | | | | |
| --- | --- | --- | --- | --- |
| **Illusory Beliefs Inventory (IBI) items** | **Original subscale** | **Factor 1** | **Factor 2** | **Factor 3** |
| Reliability (Cronbach’s Alpha) |  | .81 | .55 | .71 |
| *Factor 1: Magical & Thought fusion Beliefs* |  |  |  |  |
| | I believe in magic | | --- | | Magical beliefs | .53 | .09 | .14 |
| | I sometimes perform special rituals for protection | | --- | | Magical beliefs | .60 | .01 | .08 |
| | If I think too much about something bad, it will happen | | --- | | Internal States& TF | .59 | .08 | .01 |
| | Magical forces have impacted on my life | | --- | | Magical beliefs | .71 | .11 | .03 |
| | I do something special to prevent bad luck | | --- | | Magical beliefs | .63 | .04 | .01 |
| | Magic causes miracles to happen | | --- | | Magical beliefs | .62 | .02 | .01 |
| | If I think too much about something, it will happen | | --- | | Internal States& TF | .43 | .14 | .10 |
| | I avoid unlucky numbers | | --- | | Magical beliefs | .46 | .01 | .02 |
| *Factor 2: Scientific Beliefs* |  |  |  |  |
| | It is just a matter of time until science can explain everything | | --- | | Spirituality | .01 | .73 | .03 |
| | Life is nothing more than a series of random events (R) | | --- | | Spirituality | .02 | .32 | .03 |
| | Science is the key to understanding how things happen (R) | | --- | | Spirituality | .24 | .65 | .01 |
| *Factor 3: Spirituality* |  |  |  |  |
| I use prayer to ward off misfortune | Spirituality | .16 | .05 | .41 |
| I believe guardian angels or other spiritual forces protect me | Spirituality | .20 | .03 | .51 |
| There is an invisible force guiding us all | Spirituality | .01 | .09 | .63 |
| I believe in a higher power or God | Spirituality | .07 | .01 | .74 |

*Note.* Values represent Geomin rotated loadings (rounded to two decimals); R, reversed scored items; TF, Thought fusion
