# Supplementary material for: A cross-cultural exploration of magical thinking in obsessive-compulsive disorder: Psychometric insights from India and Australia using the Illusory Beliefs Inventory
Source: Research Square preprint supplement (doi:10.21203/rs.3.rs-7132394/v1), 2025-07-29
Supplement: Supplementary file 2 [file 481e93791165abfb40f6dcc7.docx]

| **Table 5. Rotated factor loadings for the extracted items of The Illusory Beliefs Inventory (IBI)-12 items in the Indian sample** | | | |
| --- | --- | --- | --- |
| **Illusory Beliefs Inventory (IBI) items** | **Original subscale** | **Factor 1** | **Factor 2** |
| Reliability (Cronbach’s Alpha) |  | .81 | .71 |
| *Factor 1: Magical & Thought fusion Beliefs* |  |  |  |
| | I believe in magic | | --- | | Magical beliefs | .50 | .15 |
| | I sometimes perform special rituals for protection | | --- | | Magical beliefs | .62 | .06 |
| | If I think too much about something bad, it will happen | | --- | | Internal States& TF | .62 | .01 |
| | Magical forces have impacted on my life | | --- | | Magical beliefs | .70 | .03 |
| | I do something special to prevent bad luck | | --- | | Magical beliefs | .65 | .03 |
| | Magic causes miracles to happen | | --- | | Magical beliefs | .61 | .01 |
| | If I think too much about something, it will happen | | --- | | Internal States& TF | .50 | .08 |
| | I avoid unlucky numbers | | --- | | Magical beliefs | .50 | .01 |
| *Factor 2: Spirituality* |  |  |  |
| I use prayer to ward off misfortune | Spirituality | .22 | .40 |
| I believe guardian angels or other spiritual forces protect me | Spirituality | .23 | .50 |
| There is an invisible force guiding us all | Spirituality | .09 | .61 |
| I believe in a higher power or God | Spirituality | .03 | .74 |

*Note.* Values represent Geomin rotated loadings (rounded to two decimals); TF, Thought- fusion.
