# Supplementary material for: A cross-cultural exploration of magical thinking in obsessive-compulsive disorder: Psychometric insights from India and Australia using the Illusory Beliefs Inventory
Source: Research Square preprint supplement (doi:10.21203/rs.3.rs-7132394/v1), 2025-07-29
Supplement: Supplementary file 3 [file 56bc99e9a5a22bab927500ca.docx]

| **Table 3. Rotated factor loadings for Principal Axis Factor Analysis of the Illusory Beliefs Inventory (IBI-24 items) in the Indian Sample** | | | |
| --- | --- | --- | --- |
| **Illusory Beliefs Inventory (IBI) items** | **Original subscale** | **Factor 1** | **Factor 2** |
| Reliability (Cronbach’s alpha) |  | .86 | .62 |
| *Factor 1: Magical Beliefs* |  |  |  |
| | I use prayer to ward off misfortune | | --- | | Spirituality | .46 | .13 |
| | I have sometimes changed my plans because I had a bad feeling | | --- | | Internal States& TF | .40 | .08 |
| | I believe in magic | | --- | | Magical beliefs | .53 | .18 |
| | I sometimes perform special rituals for protection | | --- | | Magical beliefs | .61 | .07 |
| | If I think too much about something bad, it will happen | | --- | | Internal States& TF | .62 | .02 |
| | Magical forces have impacted on my life | | --- | | Magical beliefs | .58 | .09 |
| | I do something special to prevent bad luck | | --- | | Magical beliefs | .59 | .01 |
| | Sometimes I get a feeling that something is going to happen, before it happens | | --- | | Internal States& TF | .48 | .06 |
| | Magic causes miracles to happen | | --- | | Magical beliefs | .57 | <0.01 |
| | If I think too much about something, it will happen | | --- | | Internal States& TF | .58 | .08 |
| | I avoid unlucky numbers | | --- | | Magical beliefs | .49 | .08 |
| | Most things that happen to us are the result of fate | | --- | | Magical beliefs | .49 | .11 |
| | I believe guardian angels or other spiritual forces protect me | | --- | | Spirituality | .53 | .28 |
| | My thoughts alone can alter reality | | --- | | Internal States& TF | .41 | .07 |
| | There is an invisible force guiding us all | | --- | | Spirituality | .48 | .18 |
| | You should never tempt fate | | --- | | Magical beliefs | .42 | .08 |
| | I believe in a higher power or God | | --- | | Spirituality | .42 | .31 |
| *Factor 2: Scientific and rational Beliefs* |  |  |  |
| | The soul does not continue to exist after death (R) | | --- | | Spirituality | .10 | .41 |
| | It is just a matter of time until science can explain everything (R) | | --- | | Spirituality | .21 | .54 |
| | It is not possible to cast a magical spell (R) | | --- | | Magical beliefs | .09 | .41 |
| | Life is nothing more than a series of random events (R) | | --- | | Spirituality | .15 | .30 |
| | Good luck charms do not work (R) | | --- | | Magical beliefs | .07 | .31 |
| | Science is the key to understanding how things happen (R) | | --- | | Spirituality | .07 | .47 |
| | I do not believe in a spiritual presence (R) | | --- | | Spirituality | .05 | .61 |

*Note.* Values represent Geomin rotated loadings (rounded to two decimals); R, reversed scored items; TF, Thought fusion.
