# Supplementary material for: A cross-cultural exploration of magical thinking in obsessive-compulsive disorder: Psychometric insights from India and Australia using the Illusory Beliefs Inventory
Source: Research Square preprint supplement (doi:10.21203/rs.3.rs-7132394/v1), 2025-07-29
Supplement: Supplementary file 4 [file f0ed0c7791c87a26302ce822.docx]

| **Table 2.** **Rotated factor loadings for the extracted items of The Illusory Beliefs Inventory (IBI)-19 items in the Australian Sample.** | | | |
| --- | --- | --- | --- |
| **Illusory Beliefs Inventory (IBI) items** | **Original subscale** | **Factor 1** | **Factor 2** |
| Reliability (Cronbach’s Alpha) |  | .86 | .88 |
| *Factor 1: Magical & Thought fusion Beliefs* |  |  |  |
| | I believe in magic | | --- | | Magical beliefs | .60 | .16 |
| | I sometimes perform special rituals for protection | | --- | | Magical beliefs | .44 | .22 |
| | If I think too much about something bad, it will happen | | --- | | Internal States& TAF | .81 | .06 |
| | Magical forces have impacted on my life | | --- | | Magical beliefs | .63 | .16 |
| | I do something special to prevent bad luck | | --- | | Magical beliefs | .62 | .01 |
| | Magic causes miracles to happen | | --- | | Magical beliefs | .64 | .07 |
| Good luck charms do not work (R) | Magical beliefs | .36 | .02 |
| | If I think too much about something, it will happen | | --- | | Internal States& TAF | .77 | .05 |
| | I avoid unlucky numbers | | --- | | Magical beliefs | .49 | .06 |
| You should never tempt fate | Magical beliefs | .53 | .13 |
| *Factor 2: Spirituality* |  |  |  |
| I use prayer to ward off misfortune | Spirituality | .12 | .63 |
| | The soul does not continue to exist after death (R) | | --- | | Spirituality | .07 | .73 |
| | It is just a matter of time until science can explain everything (R) | | --- | | Spirituality | .22 | .62 |
| Life is nothing more than a series of random events (R) | Spirituality | .14 | .57 |
| I believe guardian angels or other spiritual forces protect me | Spirituality | .23 | .68 |
| | Science is the key to understanding how things happen (R) | | --- | | Spirituality | .01 | .53 |
| There is an invisible force guiding us all | Spirituality | .34 | .56 |
| I do not believe in a spiritual presence (R) | Spirituality | .01 | .73 |
| I believe in a higher power or God | Spirituality | .01 | .82 |

*Note.* Values represent Geomin rotated loadings (rounded to two decimals); R, reversed scored items; TAF, Thought-action fusion
